# Supplementary material for: Net heterotrophy in High Arctic first-year and multi-year spring sea ice
Source: Oxford University Press journal article supplement (doi:10.1525/elementa.2021.00040), 2022-01-01
Supplement: eic-accepted_supplementary_material_ls_final.docx [file eic-accepted_supplementary_material_ls_final.docx]

**Supplementary Material**

**Text S1. List of abbreviations**

B Photosynthetic efficiency (mol O2 g chl *a*–1 h–1 [mol photons m–2 s–1])

*b*B  Slope of photoinhibited portion of photosynthesis-irradiance curve (mol O2 g chl *a*–1 h–1 [mol photons m–2 s–1])

Chl *a* Chlorophyll *a* (mg m–2)

EPS Exopolymeric substances

FYI First-year sea ice

I(0, PAR) PAR at snow/ice–atmosphere surface (mol m–2 s–1)

I(ice, PAR) PAR at the bottom ice-water interface (mol m2 s–1)

I(ROV, PAR) PAR at ROV depth in water column (mol m2 s–1)

I(z, λ) Transmitted spectral irradiance (mol m2 s–1)

I(z, PAR) Daily PAR at the bottom ice-water interface (mol m2 s–1)

IB Index of photoinhibition (IB = PBs / *b*B(mol O2 g chl *a*–1 h–1)

Ic Irradiance where the rate of photosynthesis is balanced by respiration (mol photons m–2 s–1)

Is Photoacclimation parameter (Is = PBs / B) (mol photons m–2 s–1)

MYI Multi-year sea ice

MYIthin Multi-year sea ice < 2.4 m thick

MYIthick Multi-year sea ice ≥ 2.4 m thick

NCP Net community production (mol O2 d–1)

NDI Normalised difference index

PAR Photosynthetically active radiation (400–700 nm)

PBs Maximum photosynthetic rate (mol O2 g chl *a*–1 h–1) in the absence of photoinhibition

PB0 Production at zero irradiance (mol O2 g chl *a*–1 h–1)

SID Sea ice draft (m)

T0 Time zero, start time of incubations (hour)

**Table S1.** Data collected by remotely operated vehicle (ROV) for a number of locations (*n*) interpolated across 2-m spatial grids across on May 10, 13, 17 and 22.

| **Date** | ***n*** | **SID (m)a** | **TPAR (%)b** | **Daily I(z, PAR) (mol m2 d–1)c** | **Chl *a* (mg m–2)d** | **NCP (μmol O2 l–1 d–1)e** |
| --- | --- | --- | --- | --- | --- | --- |
| FYIf | | | | | | |
| May 10 | 4222 | 1.16 ± 0.25 | 0.44 ± 0.25 | 0.20 ± 0.12 | 0.89 ± 0.30 | –1.16 ± 0.43 |
| May 13 | 562 | 1.13 ± 0.13 | 0.40 ± 0.24 | 0.15 ± 0.09 | 1.15 ± 0.30 | –1.55 ± 0.43 |
| May 17 | 4035 | 1.24 ± 0.12 | 0.55 ± 0.35 | 0.20 ± 0.13 | 1.17 ± 0.34 | –1.48 ± 0.38 |
| May 22 | 3446 | 1.23 ± 0.25 | 0.27 ± 0.15 | 0.14 ± 0.07 | 0.89 ± 0.29 | –1.21 ± 0.43 |
| Average | | 1.19 ± 0.19 | 0.42 ± 0.25 | 0.17 ± 0.10 | 1.02 ± 0.31 | –1.35 ± 0.42 |
| MYIf | | | | | | |
| May 10 | 3315 | 2.45 ± 0.54 | 0.11 ± 0.07 | 0.05 ± 0.03 | 1.05 ± 0.46 | –1.27 ± 0.63 |
| May 13 | 1993 | 2.04 ± 0.35 | 0.17 ± 0.11 | 0.07 ± 0.04 | 1.10 ± 0.30 | –1.17 ± 0.35 |
| May 17 | 1084 | 2.66 ± 0.54 | 0.11 ± 0.08 | 0.04 ± 0.03 | 1.17 ± 0.38 | –1.43 ± 0.54 |
| May 22 | 3388 | 2.61 ± 0.50 | 0.12 ± 0.06 | 0.06 ± 0.03 | 0.94 ± 0.38 | –1.09 ± 0.51 |
| Average | | 2.44 ± 0.48 | 0.13 ± 0.08 | 0.05 ± 0.03 | 1.06 ± 0.38 | –1.24 ± 0.51 |
| MYIThick (> 2.4 m)f | | | | | | |
| May 10 | 3007 | 2.92 ± 0.34 | 0.11 ± 0.06 | 0.05 ± 0.03 | 1.08 ± 0.44 | –1.79 ± 0.77 |
| May 13 | 1768 | 2.67 ± 0.17 | 0.11 ± 0.04 | 0.04 ± 0.02 | 1.04 ± 0.51 | –1.79 ± 0.90 |
| May 17 | 1055 | 2.87 ± 0.33 | 0.13 ± 0.08 | 0.05 ± 0.03 | 1.06 ± 0.37 | –1.78 ± 0.67 |
| May 22 | 2904 | 2.90 ± 0.20 | 0.14 ± 0.06 | 0.07 ± 0.03 | 0.91 ± 0.34 | –1.47 ± 0.58 |
| Average | | 2.82 ± 0.21 | 0.13 ± 0.06 | 0.05 ± 0.03 | 1.01 ± 0.41 | –1.68 ± 0.72 |
| MYIThin (≤ 2.4 m)f | | | | | | |
| May 10 | 1951 | 1.89 ± 0.29 | 0.12 ± 0.06 | 0.06 ± 0.02 | 1.04 ± 0.44 | –1.44 ± 0.77 |
| May 13 | 1203 | 1.84 ± 0.20 | 0.20 ± 0.13 | 0.08 ± 0.05 | 1.18 ± 0.25 | –1.30 ± 0.56 |
| May 17 | 508 | 1.97 ± 0.33 | 0.17 ± 0.09 | 0.06 ± 0.03 | 1.08 ± 0.38 | –1.43 ± 0.65 |
| May 22 | 2616 | 1.95 ± 0.31 | 0.11 ± 0.05 | 0.06 ± 0.03 | 0.95 ± 0.38 | –1.36 ± 0.71 |
| Average | | 1.91 ± 0.28 | 0.15 ± 0.08 | 0.06 ± 0.03 | 1.06 ± 0.36 | –1.38 ± 0.67 |

aAverage (± standard deviation) sea ice draft (SID)

bAverage (± standard deviation) photosynthetically active radiation (PAR) transmittance (TPAR)

cAverage (± standard deviation) daily integrated (24 h) transmitted irradiance of photosynthetically active radiation

(I(z, PAR))

dAverage (± standard deviation) chlorophyll *a* (chl *a*)

eAverage (± standard deviation) net community production (NCP)

fData are presented for first-year ice (FYI), all multi-year ice (MYI – All; calculated using average parameters), as well as MYI locations with SID greater than 2.4 m (MYIthick; calculated with May 23 parameters) or less than and equal to 2.4 m (MYIthin; calculated with May 7 parameters).


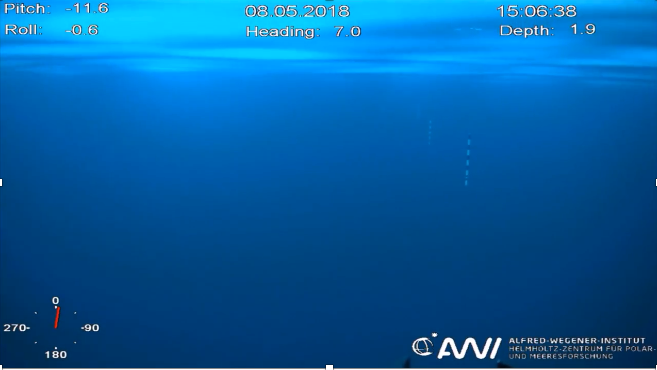

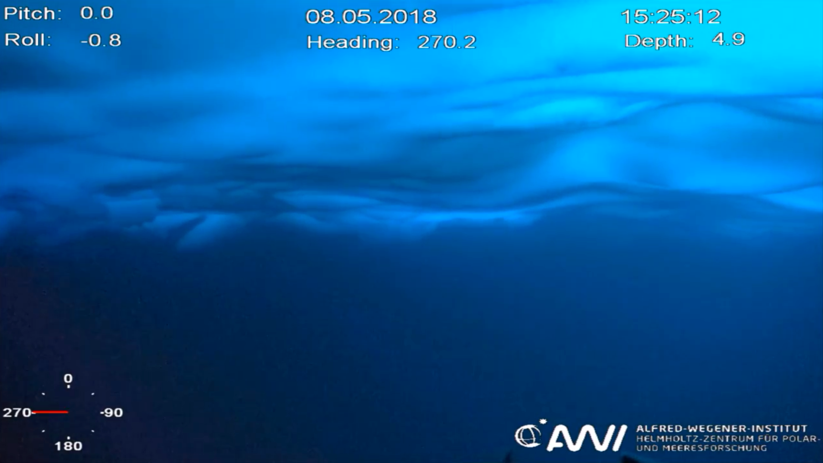

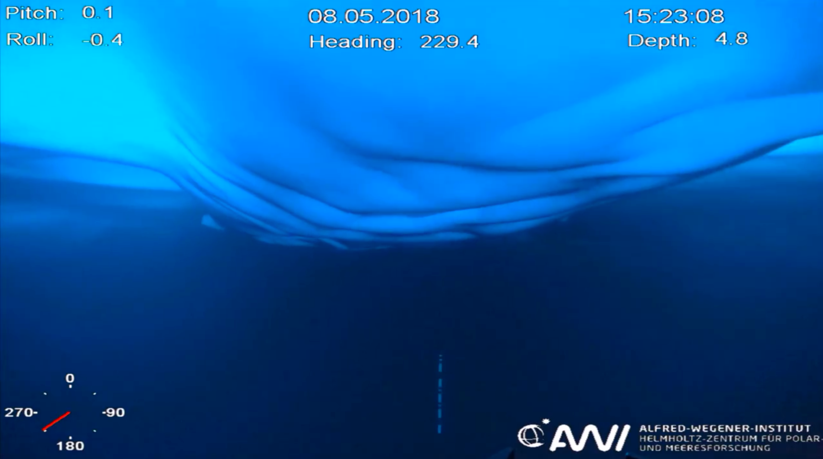


c)

b)

a)

**Figure S1.** **Sea ice sub-surfaces imaged by taken by the remotely operated vehicle (ROV) on May 8, 2018.** Images are shown for a) first-year ice, b) non-hummocked multi-year ice, and c) hummocked multiyear ice. Also visible (a, c) are the suspended transect markers of sample locations. Marker poles are 1 m long with colored segments of 0.1 m each.

**Figure S2.** **Vertical profiles of chlorophyll *a* (chl *a*) in sea ice on May 7.** Numbers indicate average (*n* = 2; with standard deviation) chl *a* sampled from the top (10–20 cm), middle (100–120 cm) and bottom (127–137 cm or 299–309 cm) of first-year and multi-year sea ice floes. Samples were processed by filtration of unbuffered sea ice melt water (24–48 h) through GF/F (Whatman) before extraction in 90% acetone for 24 h and measurement of fluorescence with 10-AU Turner Fluorometer (Parsons et al., 1984).

**Figure S3.** **Determination of optimal normalised difference indices (NDI).** (top) Pearson correlation surface between all possible normalised difference indices (NDI) calculated from transmittance (%) of wavelengths between 400 and 700 nm and depth-integrated ice core-based chlorophyll *a* (chl *a*). (Bottom) Linear regression between ice core-based and NDI-based estimates of chl *a*, calculated using wavelengths 410 and 423 nm, at transect locations sampled on May 23.

**Figure S4.** **Probability density function for measurements interpolated across calculated spatial grid.** Included are data of a) transmittance of photosynthetically active radiation (TPAR), b) chlorophyll *a* (chl *a*), and c) net community production (NCP). Spatial grids cover both first-year ice (yellow), multi-year thick ice (≥ 2.4 m; blue) and multi-year thin ice (< 2.4 m; red) through the sample period.

**Table S2.** Summary of ANOVA statistics for comparison of all point-based measurements derived from the remotely operated underwater vehicle (ROV). The ROV operated under first-year (FYI), thin multiyear (MYIthin; < 2.4 m ice draft) and thick multiyear (MYIthick; ≥ 2.4 m ice draft).

| **Parameter** | **F Statistic (DF)a** | **ANOVA *p* valueb** | **Fisher's Post-hoc Test (*p*)c** | | |
| --- | --- | --- | --- | --- | --- |
| **FYI-MYIthick** | **FYI-MYIthin** | **MYIthick-MYIthin** |
| T(z, PAR)d | 1298.4 (2, 2882) | **< 0.001** | **< 0.001** | **< 0.001** | 0.412 |
| I(z, PAR)e | 1214.484 (2, 2882) | **< 0.001** | **< 0.001** | **< 0.001** | 0.365 |
| Chl *a*f | 4.682 (2, 2882) | **0.009** | **0.005** | 0.105 | 0.395 |
| NCPg | 22.732 (2, 2882) | **<0.001** | **< 0.001** | 0.545 | **< 0.001** |

aANOVA F-test statistic and degrees of freedom (DF)

bSignificance (*p*) of ANOVA test

cSignificance (*p*) results of Fisher’s post hoc test for FYI and MYI types

dPhotosynthetically active radiation (PAR) transmittance (T(Z,PAR))

eDaily integrated PAR transmitted irradiance (I(z, PAR))

fChlorophyll *a* (chl *a*)

gNet community production (NCP)

-150

e) NCP 4:00 (µmol O2 L-1)

b) PAR transmittance (%)

-20

i) NCP daily (µmol O2 L-1)

h) NCP 14:00 (µmol O2 L-1)

g) NCP 12:00 (µmol O2 L-1)

f) NCP 8:00 (µmol O2 L-1)

d) NCP 0:00 (µmol O2 L-1)

0

0

0.

0.

0.

.0

0

0.

0

0

0

.0

.0

.0

.0

Relative Y-dimension (m)

Relative X-dimension (m)

-0.15

-0.15

-0.15

-0.15

-0.15

3

2

1

0

1.6

1.2

0.8

0.4

2

0

-0.1

-0.05

0

-100

-150

50

-50

0

-0.1

-0.05

-0.15

0

-0.05

-0.1

0

0

-50

-100

-150

50

0

-100

-50

0

50

0

-0.05

-0.1

0

-50

-100

-150

-0.05

-0.1

-0.05

-0.1

0

2

1.6

1.2

0.8

0.4

0.0

-20

20

20

20

-20

-100

50

50

50

-140

-60

-100

-140

-60

-140

-150

-60

-100

-100

-60

-20

20

-140

-100

-60

-20

20

0

-50

-100

-150

-140

20

-140

-150

-100

-50

0

-20

-60

-100

20

-20

-60

-100

-140

-150

-100

-50

50

0

-20

20

-140

-100

-60

50

0

-50

-150

-100

-100

-50

50

0

-60

20

-20

-100

-140

f) NCP 8:00 (umol O2 L-1 h-1)

d) NCP 0:00 (umol O2 L-1 h-1)

e) NCP 4:00 (umol O2 L-1 h-1)

g) NCP 12:00 (umol O2 L-1 h-1)

h) NCP 16:00 (umol O2 L-1 h-1)

**Figure S5.** **Interpolated surfaces of ROV-based measurements (points) under first-year sea ice on May 10.** Included are a) sea ice draft, b) transmittance of photosynthetically active radiation (PAR), c) NDI-derived chlorophyll *a* (chl *a*), and net community production (NCP) at local hours d) 12 am, e) 4 am, f) 8 am, g) 12 pm, h) 4 pm (CET – 4 h) and i) integrated over the 24-h day.

Net community production variance (µmol O2 d–1)

a) May 10

b) May 17

0.10

0.20

0.20

0.10

Lag distance (m)

**Figure S6.** **Empirical semivariograms calculated via exponential model of net community production variance on for first-year sea ice.** Data used are from a) May 10 and b) May 17. Variograms were calculated using Matlab R2019b and a bin size of 25 m. Range values of the exponential model, representing patch size of net community production (NCP), were determined as the lag distance at which the model reaches 95% of the sill variance. –

Net community production variance (µmol O2 h–1)

Time of day (h)

20:00

15:00

10:00

5:00

**Figure S7. Hourly net community production (NCP) of first-year sea ice on May 10.** Median (orange) and mean (blue) ROV-based measurements of NCP with standard deviations (dashed) are shown with hours in local time (CET – 4 h).
